# Supplementary material for: Preparation of 1,5-dinitrenonaphthalene in cryogenic matrices
Source: Royal Society of Chemistry journal article supplement (doi:10.1039/b008560j), 2001-01-01
Supplement: b008560j.doc [file b008560j.doc]

**1. 1,5-Diazidonaphthalene (1)**

There are three isomers for **1**. The computational results of three isomers obtained at the B3LYP/6-31G* level were shown below. The calculated and observed FT-IR spectra indicated that the most stable isomer(1) would be a dominant species in the matrix.

Optimized geometries and energies of three isomers of **1** calculated at the B3LYP/6-31G* level. Bond lengths in angstroms. Energies in hartrees.

**Table.** Energies*a* of three isomers of **1** estimated at the B3LYP/6-31G* level.

HF ZPEa E / kcal·mol-1

Isomer(1) -713.070543 0.150960 0.0

Isomer(2) -713.064323 0.150853 +3.8

Isomer(3) -713.057615 0.150662 +7.9

*a*Zero-point energies estimated at the UB3LYP/6-31G* level (scaled by 0.9806).


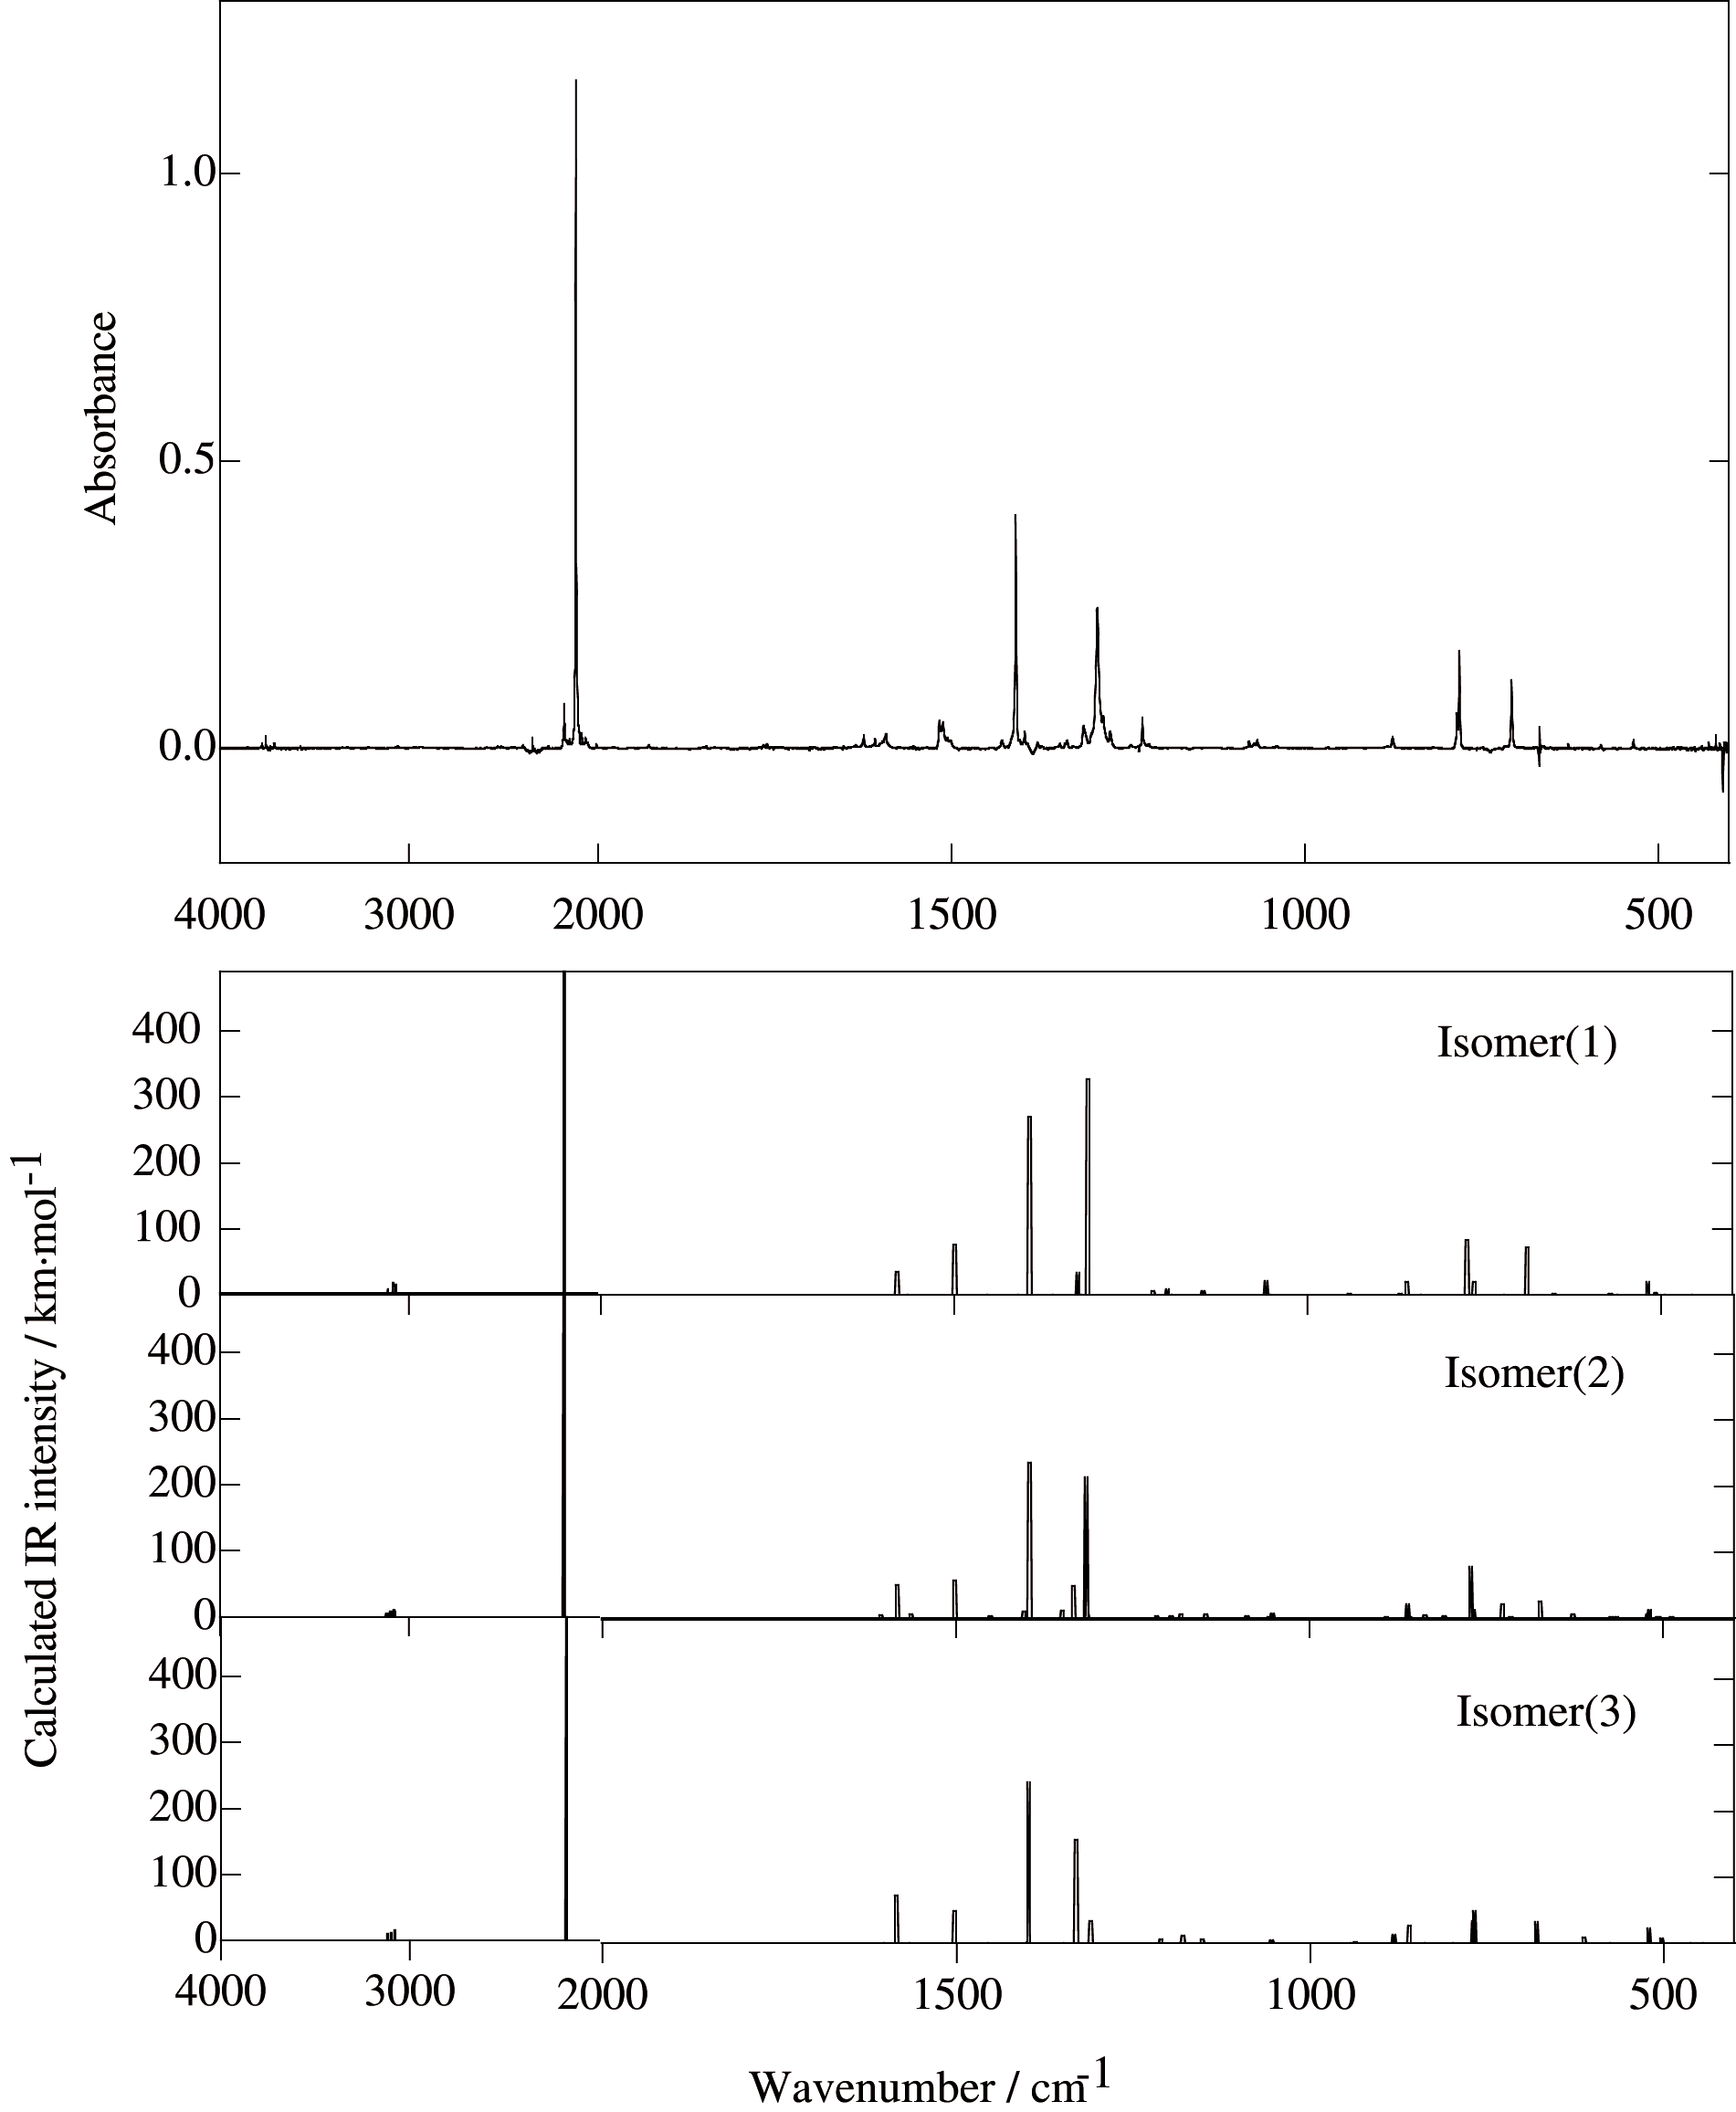


**Figure.** Observed FT-IR spectra of **1** in an argon matirx at 11 K and the theoretical IR spectra of three isomers of **1** calculated at the B3LYP/6-31G* level.

**Table.**  Observed and calculated IR data of **1**.

Isomer(1) Isomer(2) Isomer(3) Obs.

 / cm-1 *I* / km·mol-1 / cm-1 *I* / km·mol-1 / cm-1 *I* / km·mol-1 / cm-1

502.3 7.5

518.4 19.3 519.4 13.4 520.4 23.3 535

521.7 5.9

627.7 5.6 611.9 8.7

690.0 72.4 673.7 26.0 679.2 32.2 707

727.6 20.6

765.0 20.0 767.8 13.4 767.0 49.5

774.5 83.4 771.9 78.2 769.2 34.0 781

859.7 19.2 861.5 20.9 859.9 27.1 876

881.3 13.3

1059.2 20.5 1052.6 6.9 1054.2 5.4 1067, 1079

1148.4 5.1 1146.7 5.5 1152.2 6.1

1198.9 8.7 1182.3 5.4 1179.4 11.4

1218.7 5.7 1211.1 6.1

1314.7 6.7 1309.9 33.9

1311.2 326.9 1316.3 213.7 1330.7 157.4 1294

1325.4 33.1 1333.8 48.5 1313

1350.0 11.6

1393.6 270.4 1396.4 235.7 1398.2 244.3 1409

1404.5 9.5

1499.4 76.9 1501.7 57.5 1503.1 48.4 1516, 1512

1563.7 5.3

1580.6 34.3 1583.1 50.9 1584.7 71.9 1593

2176.3 1928.9 2173.1 881.0 2174.1 1273.5 2116, 2177

2180.7 678.5

3069.5 16.0 3071.4 7.1

3078.3 10.6 3080.5 15.2

3083.7 18.0 3085.6 8.2

3097.7 7.6 3100.5 12.0

3109.2 7.9 3119.3 5.2 3118.8 9.8

The IR bands with intensity > 5 km·mol-1 are listed.

**2. 1-Azido-5-nitrenonaphthalene (2)**

There are two isomers for **2**. The computational results of two isomers obtained at the UB3LYP/6-31G* level were shown below. The calculated and observed FT-IR spectra indicated that the most stable isomer(1) would be a dominant species in the matrix.

Optimized geometries and energies of three isomers of **1** calculated at the B3LYP/6-31G* level. Bond lengths in angstroms. Energies in hartrees.

**Figure.** Observed FT-IR spectra of **1** in an argon matirx at 11 K and the theoretical IR spectra of three isomers of **1** calculated at the B3LYP/6-31G* level.

**Table.** Observed and calculated IR data of **1**.

Isomer(1) Isomer(2) Obs.

 / cm-1 *I* / km·mol-1 / cm-1 *I* / km·mol-1 / cm-1

517.6 10.6 517.2 11.8

588.2 10.1

677.5 8.8

725.8 15.0 698.0 10.2

762.5 78.6 760.8 26.9 769

763.4 9.9 761.6 43.1 783

800.2 7.4

892.8 14.3 893.2 8.5 911

898.0 9.3

1044.4 9.0

1127.5 8.3 1132.5 9.8 1158

1187.3 11.4 1171.7 12.9 1135, 1140

1204.1 7.2

1248.4 14.6 1247.1 16.0 1259

1283.5 20.2 1271

1317.7 179.8 1324.7 34.3 1292

1338.8 60.1 1348.0 92.2 1300, 1310

1354.1 8.7 1354

1393.4 12.0

1428.0 53.7 1424.9 48.8 1438, 1446

1472.7 12.5 1467

1543.1 69.1 1540.2 46.3 1558

1580.9 11.6 1580.7 35.0

2180.6 923.0 2173.4 642.2 2122

3071.0 6.6

3074.2 7.9 3079.4 7.2

3084.5 7.0 3101.6 8.0

3099.7 8.1

The IR bands with intensity > 6 km·mol-1

**3. 1,5-Dinitrenonaphthalene (3)**

As described in the main text, the state order in the dinitrene is difficult to reproduce. The results obtained at several computational levels were listed below. The computation at the CAS(6,6)/6-31G* // UB3LYP/6-31G* level gave the wrong state order. The geometry optimized using CAS method gave the enhanced bond alternation.

**Table.** Relative energies*a* of dinitrene **3** with different spin multiplicities estimated by several computational methods.

UB3LYP/6-31G* CCSD(T)/6-31G*

// UB3LYP/6-31G*

Energy*a* <S2> Energy*a* <S2>

(Singlet)*b* +41.4 kcal·mol-1 0.00

Quintet +8.0 kcal·mol-1 6.06 +22.0 kcal·mol-1 6.66

Triplet +6.3 kcal·mol-1 2.03 +16.3 kcal·mol-1 3.07

Singlet -494.025716*c* 1.78 -492.506586 0.00

CAS(6,6)/6-31G* CAS(6,6)/6-31G* CASMP2(6,6)/6-31G*

// UB3LYP/6-31G* // CAS(6,6)/6-31G* // CAS(6,6)/6-31G*

Quintet +10.4 kcal·mol-1 +12.2 kcal·mol-1 +4.6 kcal·mol-1

Triplet -7.6 kcal·mol-1 +0.3 kcal·mol-1 +0.4 kcal·mol-1

Singlet -490.985133 -491.002923 -490.985133

*a*Energies were corrected by zero-point energies estimated at the UB3LYP/6-31G* level (scaled by 0.9806).

*c* Estimated by the spin-restricted method.

*c* Estimated by the symmetry-broken spin-unrestricted method without sum correction.

Optimized geometries and energies of three isomers of **1** calculated at the B3LYP/6-31G* level. And at the CAS(6,6)/6-31G* level. Bond lengths in angstroms. Energies in hartrees.

**Figure.** Observed IR spectra of **3** in an argon matrix at 11K and theoretical IR spectra of 1,5-dinitrenonaphthalene with different spin multiplicities.

**Table.** Observed and calculated IR data of **3**.

UB3LYP/6-31G* CASSCF(6,6)/6-31G*a Obs.

 / cm-1 *I* / km·mol-1 / cm-1 / cm-1 / cm-1 *I* / km·mol-1 / cm-1 UB3LYP/6-31G* CAS(6,6)/6-31G* Obs

Au 451.3 5.0 441.3

Bu 483.4 54.7 540.9 507

Bu 503.1 14.8 551.9

Au 742.0 82.9 781.0 750

Bu 751.8 19.3 827.0

Bu 908.3 20.5 983.7 1033

Bu 1036.6 19.3 1092.2 1161

Bu 1148.2 26.1 1275.5 1212

Bu 1246.9 33.0 1435.5 1279

Bu 1376.4 12.4 1548.6 1393

Bu 1436.6 32.9 1737.8

Bu 1479.7 24.4 1810.8 1466

Bu 1529.4 5.2 1889.6 1506

Bu 3076.7 15.6 3376.5

Bu 3106.9 12.3 3404.4

The IR bands with intensity > 5 km·mol-1 are listed. a IR intensities could not obtained by CASSCF calculation using Gaussian98.

**4. ESR measutment**

ESR spectra were measured on a JEOL JES-RE3X spectrometer equipped with an optical transmission cavity equipped with Air Products LTD-3 liquid helium transfer system. All measurements were carried out at 78 K.

Diazido precursor was dissolved in purified 1-methyltetrahydrofuran. The solution (4.6 mM) was placed within a quartz 4mm o.d. ESR sample tube and degassed by freeze-pump-thaw cycles. The sample set to the cavity at 78K was irradiated with an USHIO UI-501C xenon lamp through Toshiba UV-D36B band-pass filter (360 <  < 380 nm).

Observed spectrum is shown below. Signals at 622 and 611 mT were ascribed to triplet mononitrenes. Signals ascribable to a dinitrene with higher spin multiplicity were not observed. The reason for absence can be explained as follows: since the ground state of 1,5-dinitrenonaphthalene was a singlet diradical and it has a large ES–T, the population of the thermally-excited triplet state is too low to detect. To consider this interpretation, we theoretically estimated the relative energies of 2,7-dinitrenophenanthrene **5** whose nitreno groups are connected to rigid aromatic hydrocarbons. This dinitrene showed the highest ES–T value (0.93 kcal·mol-1)3 among the investigated quinonoidal dinitrenes1: the ES–T value obtained experimentally by the temperature-dependent ESR study. The predicted ES–T value of **5** (5.7 kcal·mol-1) is smaller than that of **3** (6.3 kcal·mol-1) at the same computational level (see ESI). The observed ESR signals due to the thermally excited triplet state were quite weak even for **5**.3


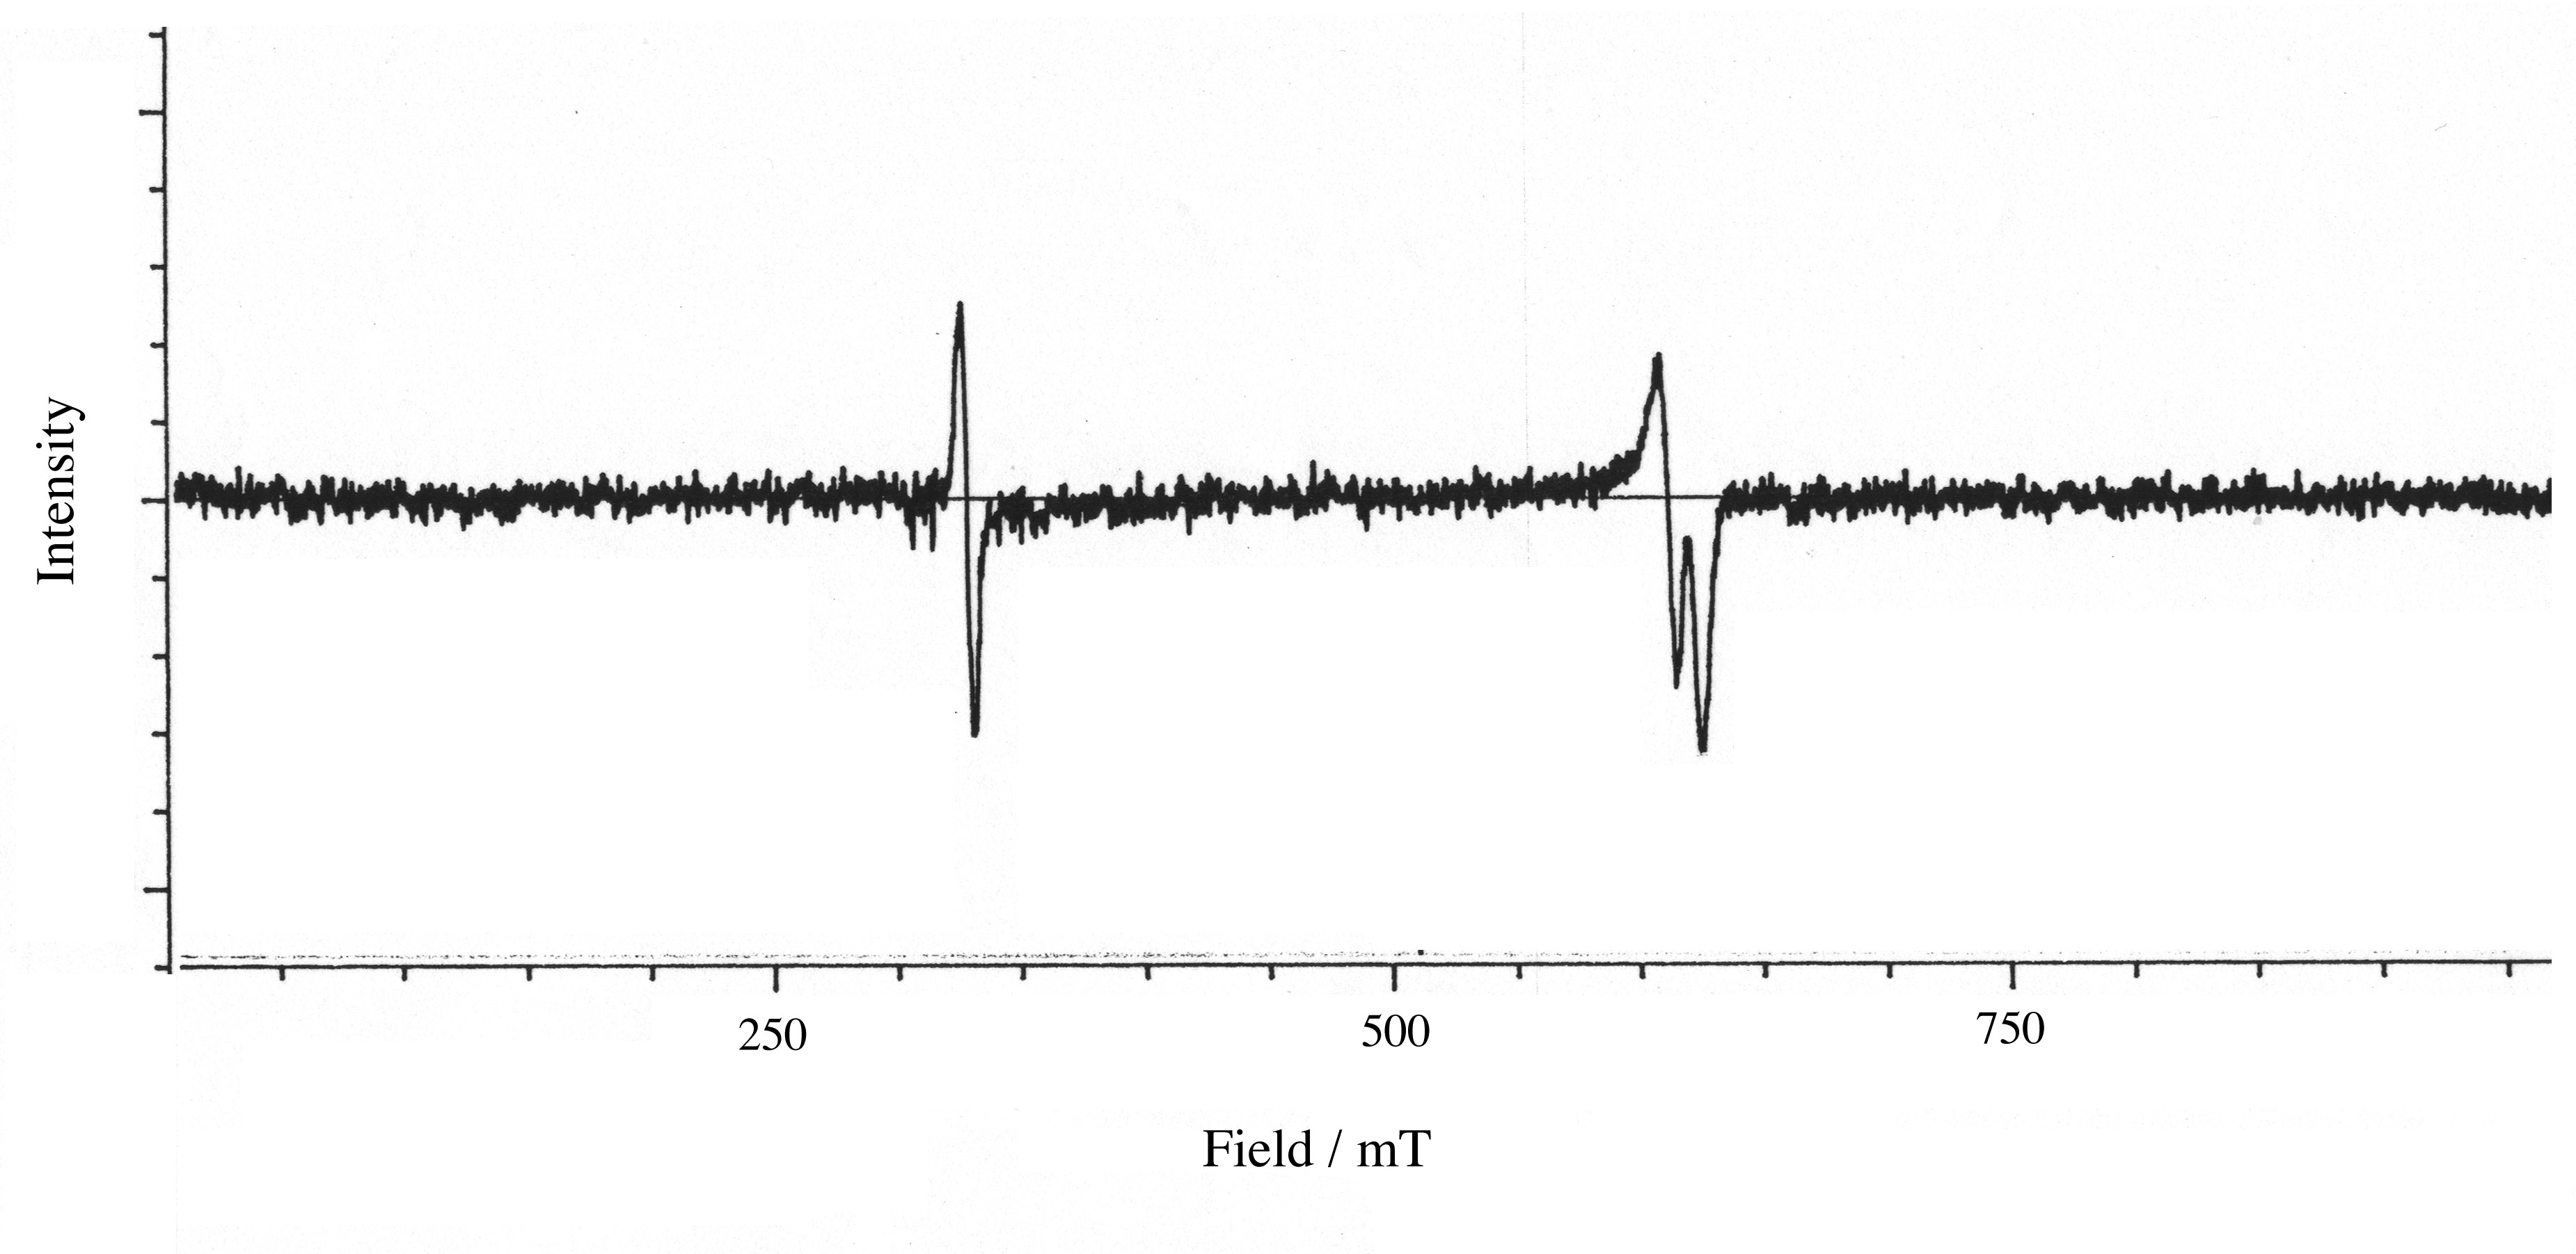


**Figure.** The ESR spectra of **3** in a glassy MTHF matrix observed upon irradiation with a xenon lamp through a band-pass filter (360 <  < 380 nm) for 15 min.

**5. Computational study of the dinitrenes**

In the quinonoidal dinitrenes, the ground state is the singlet diradical state which lies slightly below the triplet state: their energy gaps between singlet and triplet states (ES-T) are rather small (<1 kcal·mol-1). The state order of the dinitrene with different spin multiplicities was often difficult to reproduce in the computational study because of the multireference character of singlet diradicals. However, calculations using the symmetry-broken spin-unrestricted DFT (UDFT) method could give the correct state order as reported by Lahti et al.(*J. Phys. Chem. A.*, 2001, **105**, 251.) These results suggest that the UDFT method can describe successfully the electronic state of singlet diradicals. A major drawback of the UDFT method for treating diradicals is that the singlet state can be highly spin-contaminated. Indeed, the UDFT solution for **3** showed the <S2> value of 1.78, indicating the admixure of the triplet and quintet states, and showed relatively large deviations in the wavenumbers in IR bands. However, the spectral features of observed IR spectra were qualitatively reproduced by the UDFT computation. If almost the same amount of spin contamination is shown in two different systems, the estimated ES-T values could be compared qualitatively. In the literature by Lahti et al., dinitrenobiphenyl (**bpn**) and dinitrenostylbene (**stn**) showed <S2> values of 1.61 and 1.51, respectively. The experimental ES-T values of **bpn** and **stn** were 0.75 and 0.47, respectively (*J. Am. Chem. Soc.,* 1997, **119**, 2187.), whereas the predicted ES-T values were 3.2 and 2.7, respectively. Although only one example is available, it seems that the UDFT method may qualitatively predict the relative ES-T values for dinitrenes despite of the overestimation.

To consider the interpretation of ES-T of the dinitrene **3**, we compared the theoretically-estimated energies of **3** in different spin multiplicities with those of two other quinonoidal dinitrenes, 1,4-dinitrenobenzene **4** and 2,7-dinitrenophenanthrene **5**, whose nitreno groups are connected to rigid aromatic hydrocarbons. The obtained results are summarized in the following table.

**Table.** Relative energies*a* of **3**, **4**, and **5** with different spin multiplicities estimated at the UB3LYP/6-31G* level.

**3** **4**

Quintet +8.0 kcal·mol-1 <S2>=6.06 +33.1 kcal·mol-1 <S2>=6.02

Triplet +6.3 kcal·mol-1 <S2>=2.03 +1.5 kcal·mol-1 <S2>=2.02

Singlet*b* -493.768975 <S2>=1.78 -340.317779 <S2>=1.11

**5**

Quintet +7.5 kcal·mol-1 <S2>=6.07

Triplet +5.7 kcal·mol-1 <S2>=2.03

Singlet *b* -647.665910 <S2>=1.79

*a*All energies were corrected by zero-point energies estimated at the UB3LYP/6-31G* level (scaled by 0.9806).

*b* Estimated by the symmetry-broken spin-unrestricted method without sum correction.

Among the three, **3** and **5** showed the similar spin contamination. Therefore, the experimental results are discussed from these computational results. The dinitrene **5** showed the highest ES–T value (0.93 kcal·mol-1)3 among the investigated quinonoidal dinitrenes.1 The predicted ES–T value of **5** (5.7 kcal·mol-1) is smaller than that of **3** (6.3 kcal·mol-1). This computational results suggested that **3** would show the high ES–T value as well as **5**.

The difference in the ES–T values of 1,5-dinitrenonaphthalene **3**, 1,4-dinitrenobenzene **4**, and 2,7-dinitrenophenanthrene **5** could be explained on the basis of the spin distributions that were estimated by the unrestricted method (UB3LYP/6-31G* level). Atomic spin density values of **3**, **4**, and **5** are depicted in Figure. In all compounds, the spin densities on nitrogen atoms are more than 1.00, which reveals the spin alignment due to the one-center interaction between and  electrons of a nitrogen atom. The spin densities of nitrogen atoms in **3**, **4**, and **5** are in order of **5** > **3** > **4**, which is different from the order in the ES–T values (**3** > **5** > **4**). Whereas spin densities on the carbon atom adjacent to nitrogen atoms (underlined) in **3**, **4**, and **5** are in the same order as that in the ES–T values. This value would reflect two polarization effects: (1) polarization effect from the radical center on the adjacent nitrogen atom. (2) polarization effect from the other radical center through aromatic system. The latter effect would be lager in **3** than in **5**, which resulted in the change of the order. Indeed, the larger spin polarization (0.3248) was observed for **3** on the central carbon atoms in the naphthalene framework in comparison with that for **4** (0.1846) and **5** (0.2604) (Figure). These results suggested that the larger spin polarization on the aromatic system, in particular, on the atoms on the pathway connecting two radical centers, enhanced the stability of the singlet state of **3**.

**Figure.**  Atomic spin density values of **3**, **4**, and **5** estimated

at the UB3LYP/6-31G* level.
